# Supplementary material for: Nominally stoichiometric Na3(WxSixSb1−2x)S4 as a superionic solid electrolyte
Source: Royal Society of Chemistry journal article supplement (doi:10.1039/d1qi01508g), 2022-01-01
Supplement: d1qi01508g1.pdf [file d1qi01508g1.pdf]

## Supplementary Information

### Nominally stoichiometric $\text{Na}_3(\text{W}_x\text{Si}_x\text{Sb}_{1-2x})\text{S}_4$ as a superionic solid electrolyte

Suyeon Han,<sup>‡a</sup> Jung Yong Seo,<sup>‡a</sup> Woon Bae Park,<sup>\*a</sup> S. J. Richard Prabakar,<sup>a</sup> Sangwon Park,<sup>a</sup>

Kee-Sun Sohn<sup>\*b</sup> and Myoungho Pyo<sup>\*a</sup>

<sup>a</sup> *Department of Advanced Components and Materials Engineering, Suncheon National*

*University, Chonnam 57922, Republic of Korea E-mail: wbpark@scnu.ac.kr (W. B. Park),*

*mho@suncheon.ac.kr (M. Pyo)*

<sup>b</sup> *Faculty of Nanotechnology and Advanced Materials Engineering, Sejong University, Seoul*

*05006, Republic of Korea. kssohn@sejong.ac.kr*

<sup>‡</sup> These two authors contributed equally to the work

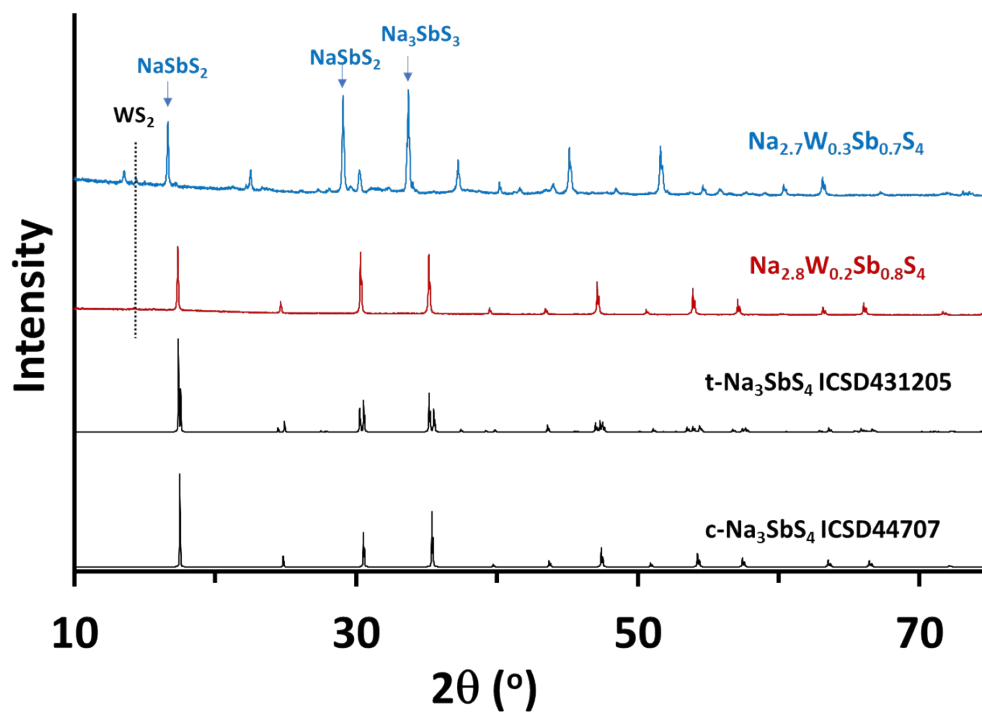

**Fig. S1** XRD patterns of  $\text{Na}_{2.8}\text{W}_{0.2}\text{Sb}_{0.8}\text{S}_4$  and  $\text{Na}_{2.8}\text{W}_{0.3}\text{Sb}_{0.7}\text{S}_4$ . The presence of small amounts of  $\text{WS}_2$  and  $\text{Na}_n\text{SbS}_m$  impurities are noticeable.

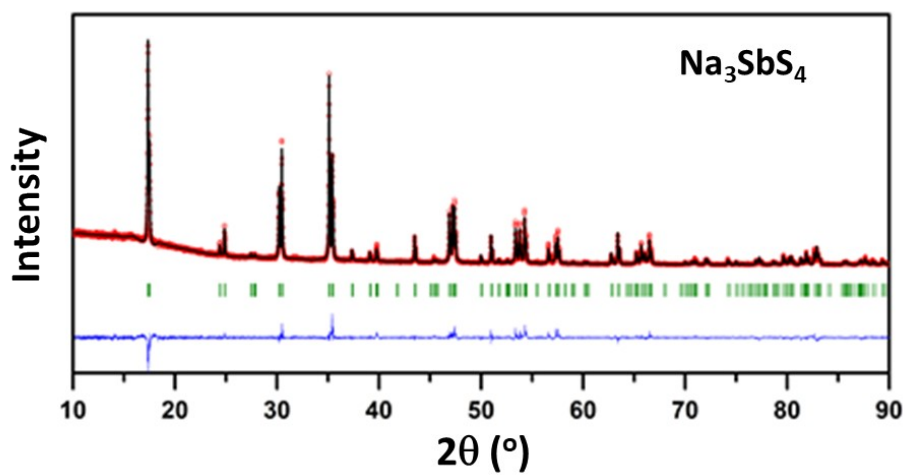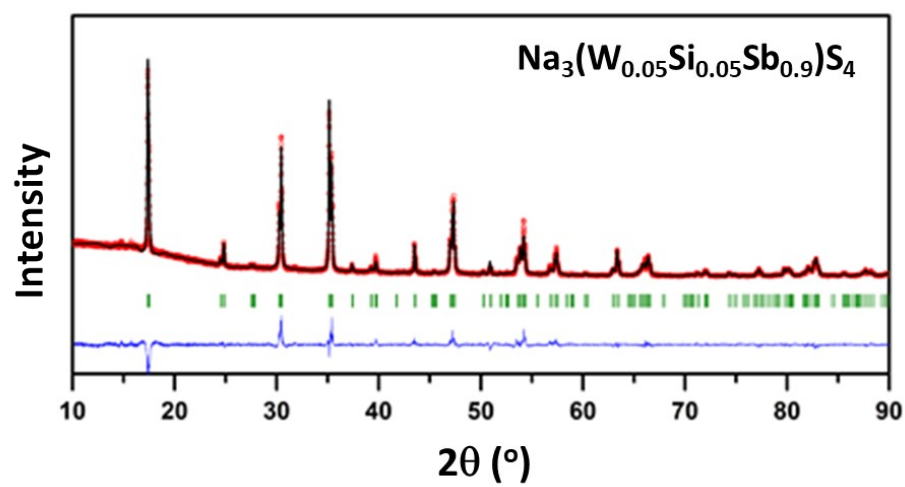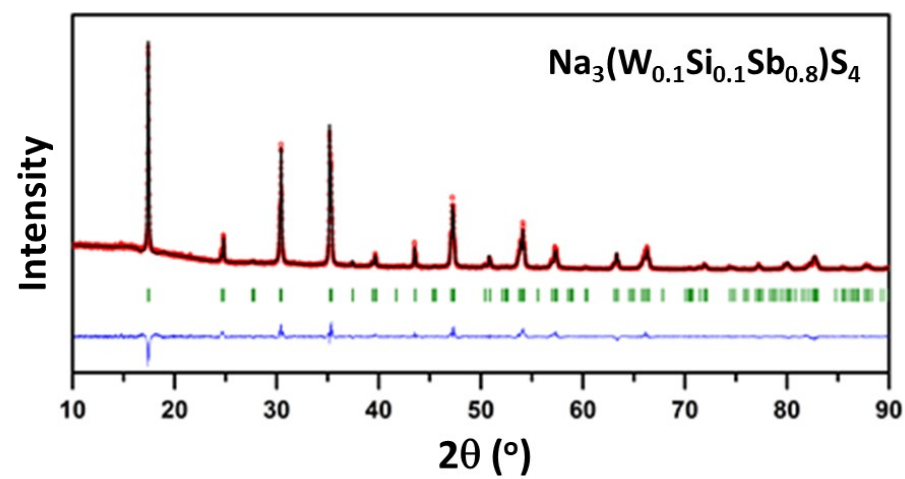

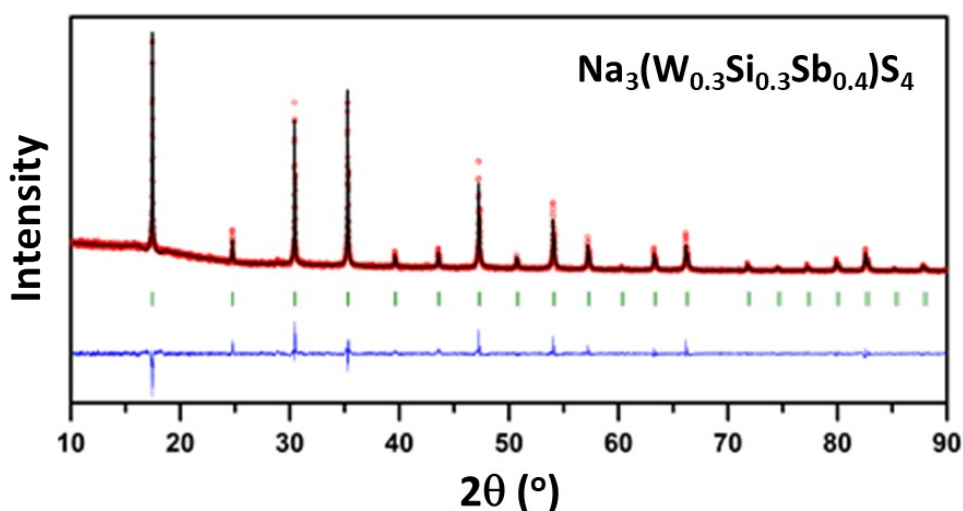

**Fig. S2** Full pattern Rietveld refinement fits obtained using either  $P-42_1c$  or  $I-43m$  space groups. In the figure, experimental, calculated, and difference profiles are shown by red dots and by black and blue lines, respectively. The vertical tick marks above the difference profile denote the position of Bragg reflections. For the Rietveld fit of  $\text{Na}_3(\text{W}_{0.2}\text{Si}_{0.2}\text{Sb}_{0.6})$ , see the text.

**Table S1**

Atomic coordinate and site occupancy factor (SOF) of  $\text{Na}_3\text{SbS}_4$ .

| Atom | Wyckoff symbol | x/a       | y/b       | z/c       | U ( $\text{\AA}^2$ ) | SOF |
|------|----------------|-----------|-----------|-----------|----------------------|-----|
| Na   | 4d             | 0         | 0.5       | 0.4363(8) | 0.040(3)             | 1.0 |
| Na   | 2b             | 0         | 0         | 0.5       | 0.043(3)             | 1.0 |
| Sb   | 2a             | 0         | 0         | 0         | 0.018(1)             | 1.0 |
| S    | 8e             | 0.2899(6) | 0.3215(6) | 0.6914(5) | 0.022(1)             | 1.0 |

Space group:  $P-42_1c$

Number of formula per unit cell (z) = 2

Lattice parameters:  $a = 7.1649(1) \text{ \AA}$ ,  $c = 7.2979(1) \text{ \AA}$ ,  $\alpha = \beta = \gamma = 90^\circ$

Agreement factors:  $R_p = 7.20$ ,  $R_{wp} = 10.2$ ,  $R_{exp} = 6.10$  and  $\chi^2 = 2.82$

**Table S2**Atomic coordinate and site occupancy factor (SOF) of Na<sub>3</sub>(W<sub>0.05</sub>Si<sub>0.05</sub>Sb<sub>0.9</sub>)S<sub>4</sub>.

| Atom | Wyckoff symbol | x/a       | y/b       | z/c        | U (Å <sup>2</sup> ) | SOF  |
|------|----------------|-----------|-----------|------------|---------------------|------|
| Na   | 4d             | 0         | 0.5       | 0.4423(10) | 0.041(3)            | 1.0  |
| Na   | 2b             | 0         | 0         | 0.5        | 0.037(4)            | 1.0  |
| Sb   | 2a             | 0         | 0         | 0          | 0.016(1)            | 0.9  |
| Si   | 2a             | 0         | 0         | 0          | 0.016(1)            | 0.05 |
| W    | 2a             | 0         | 0         | 0          | 0.016(1)            | 0.05 |
| S    | 8e             | 0.2967(7) | 0.3174(6) | 0.6940(5)  | 0.015(1)            | 1.0  |

Space group: *P*-42<sub>1</sub>*c*

Number of formula per unit cell (z) = 2

Lattice parameters: a = 7.1711(1) Å, c = 7.2612(2) Å, α = β = γ = 90°

Agreement factors: R<sub>p</sub> = 6.88, R<sub>wp</sub> = 11.5, R<sub>exp</sub> = 6.01 and χ<sup>2</sup> = 3.09**Table S3**Atomic coordinate and site occupancy factor (SOF) of Na<sub>3</sub>(W<sub>0.1</sub>Si<sub>0.1</sub>Sb<sub>0.8</sub>)S<sub>4</sub>.

| Atom | Wyckoff symbol | x/a       | y/b       | z/c        | U (Å <sup>2</sup> ) | SOF |
|------|----------------|-----------|-----------|------------|---------------------|-----|
| Na   | 4d             | 0         | 0.5       | 0.4435(13) | 0.101(4)            | 1.0 |
| Na   | 2b             | 0         | 0         | 0.5        | 0.085(5)            | 1.0 |
| Sb   | 2a             | 0         | 0         | 0          | 0.039(1)            | 0.8 |
| Si   | 2a             | 0         | 0         | 0          | 0.039(1)            | 0.1 |
| W    | 2a             | 0         | 0         | 0          | 0.039(1)            | 0.1 |
| S    | 8e             | 0.2986(6) | 0.3232(5) | 0.6931(5)  | 0.049(1)            | 1.0 |

Space group: *P*-42<sub>1</sub>*c*

Number of formula per unit cell (z) = 2

Lattice parameters: a = 7.1795(1) Å, c = 7.2411(1) Å, α = β = γ = 90°

Agreement factors: R<sub>p</sub> = 6.26, R<sub>wp</sub> = 8.38, R<sub>exp</sub> = 5.20 and χ<sup>2</sup> = 2.60**Table S4**

Atomic coordinate and site occupancy factor (SOF) of Na<sub>3</sub>(W<sub>0.2</sub>Si<sub>0.2</sub>Sb<sub>0.6</sub>)S<sub>4</sub>.

| Atom | Wyckoff symbol | x/a       | y/b       | z/c       | U (Å <sup>2</sup> ) | SOF       |
|------|----------------|-----------|-----------|-----------|---------------------|-----------|
| Na   | 6b             | 0         | 0         | 0.5       | 0.048(3)            | 0.84(3)   |
| Na   | 12d            | 0.75      | 0.5       | 0         | 0.10(6)             | 0.078(16) |
| Sb   | 2a             | 0         | 0         | 0         | 0.025(1)            | 0.6       |
| Si   | 2a             | 0         | 0         | 0         | 0.025(1)            | 0.2       |
| W    | 2a             | 0         | 0         | 0         | 0.025(1)            | 0.2       |
| S    | 8c             | 0.1885(6) | 0.1885(6) | 0.1885(6) | 0.048(3)            | 1.0       |

Space group: *I*-43*m*

Number of formula per unit cell (z) = 2

Lattice parameters: a = 7.1997(1) Å, α = β = γ = 90°

Agreement factors: R<sub>p</sub> = 8.61, R<sub>wp</sub> = 11.3, R<sub>exp</sub> = 10.14 and χ<sup>2</sup> = 1.24

**Table S5**Atomic coordinate and site occupancy factor (SOF) of Na<sub>3</sub>(W<sub>0.3</sub>Si<sub>0.3</sub>Sb<sub>0.4</sub>)S<sub>4</sub>.

| Atom | Wyckoff symbol | x/a       | y/b       | z/c       | U (Å <sup>2</sup> ) | SOF       |
|------|----------------|-----------|-----------|-----------|---------------------|-----------|
| Na   | 6b             | 0         | 0         | 0.5       | 0.332(5)            | 0.813(19) |
| Na   | 12d            | 0.75      | 0.5       | 0         | 0.37(3)             | 0.094(9)  |
| Sb   | 2a             | 0         | 0         | 0         | 0.265(1)            | 0.4       |
| Si   | 2a             | 0         | 0         | 0         | 0.265(1)            | 0.3       |
| W    | 2a             | 0         | 0         | 0         | 0.265(1)            | 0.3       |
| S    | 8c             | 0.1879(4) | 0.1879(4) | 0.1879(4) | 0.296(1)            | 1.0       |

Space group: *I*-43*m*

Number of formula per unit cell (z) = 2

Lattice parameters: a = 7.1932(1) Å, α = β = γ = 90°

Agreement factors: R<sub>p</sub> = 7.29, R<sub>wp</sub> = 9.80, R<sub>exp</sub> = 7.63 and χ<sup>2</sup> = 1.65

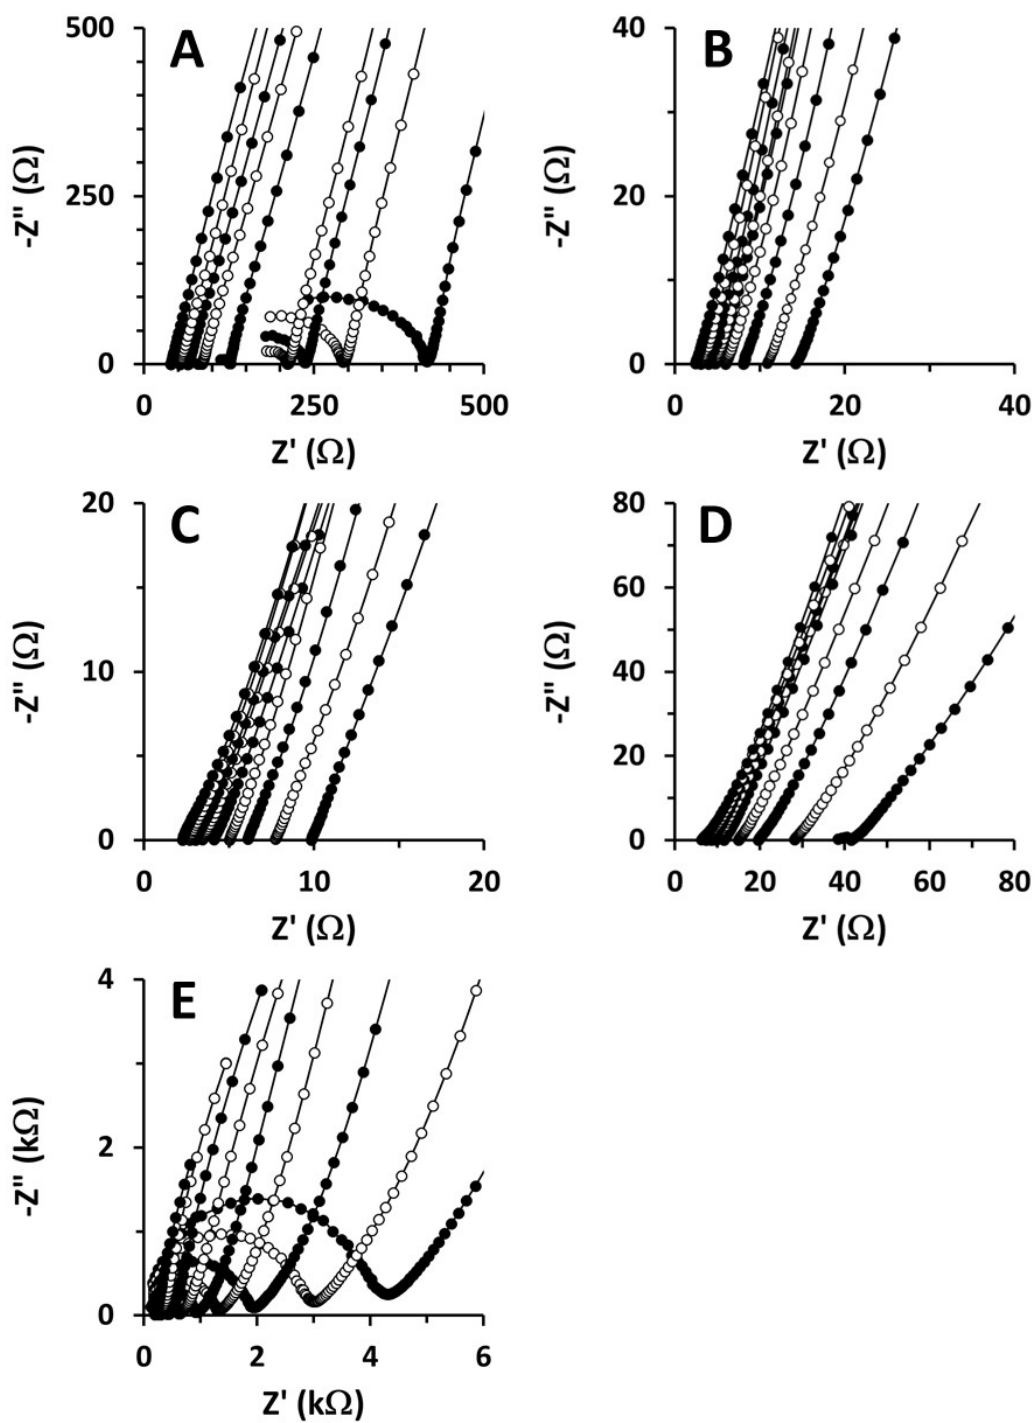

**Fig. S3** EIS spectra at various temperature between  $-20$  and  $+60$   $^{\circ}\text{C}$  for (A)  $x = 0$ , (B)  $x = 0.1$ , (C)  $x = 0.2$ , (D)  $x = 0.3$ , and (E)  $x = 0.4$  in  $\text{Na}_3(\text{W}_x\text{Si}_y\text{Sb}_{1-2x})\text{S}_4$ .
